# Supplementary material for: Ultra-selective ferric ion-complexed membranes composed of water-based zwitterionic comb copolymers
Source: Royal Society of Chemistry journal article supplement (doi:10.1039/c9ta06216e), 2019-01-01
Supplement: c9ta06216e1.pdf [file c9ta06216e1.pdf]

Supporting Information

## **Ultra-selective Ferric Ion-complexed Membranes**

### **Composed of Water-based Zwitterionic Comb**

### **Copolymers**

Min Su Park, Na Un Kim, Byeong Ju Park, Du Yeol Ryu, Jong Hak Kim\*

*Department of Chemical and Biomolecular Engineering, Yonsei University, 50 Yonseiro,  
Seodaemun-gu, Seoul 03722, South Korea*

\* To whom correspondence should be addressed

Tel: +82-2-2123-5757; Fax: +82-2-312-6401

E-mail: [jonghak@yonsei.ac.kr](mailto:jonghak@yonsei.ac.kr)

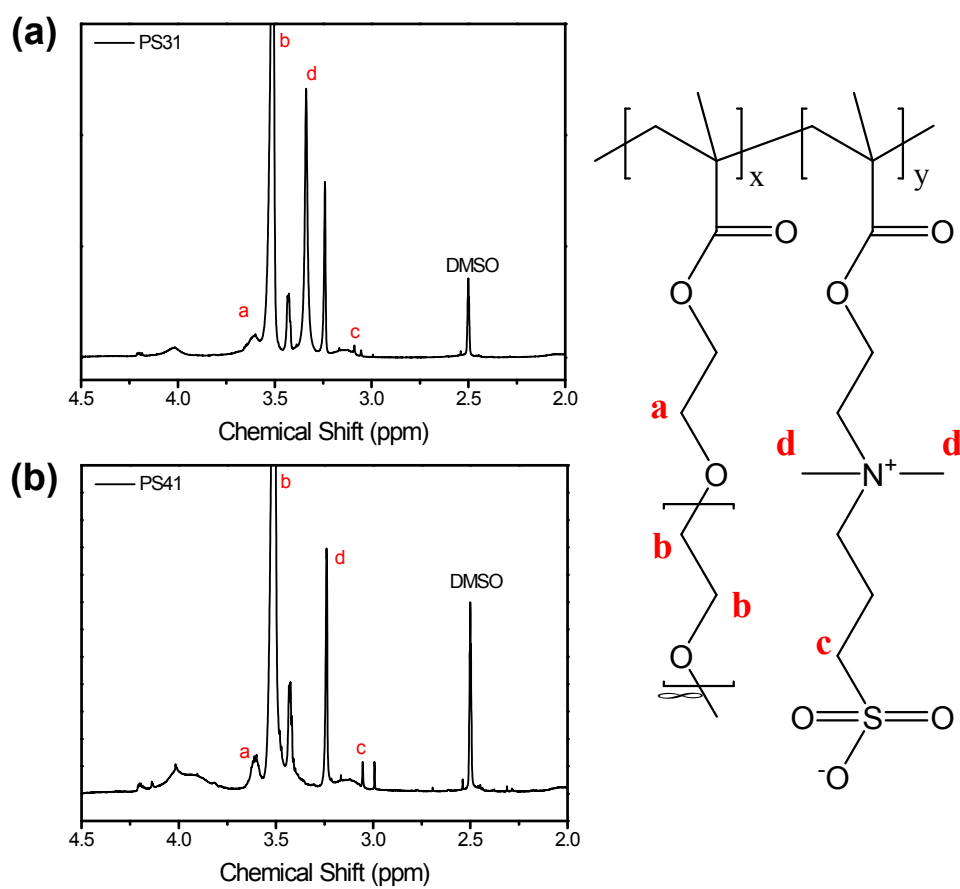

**Fig. S1.**  $^1\text{H}$ -NMR spectra of PS31 and PS41 comb copolymers.

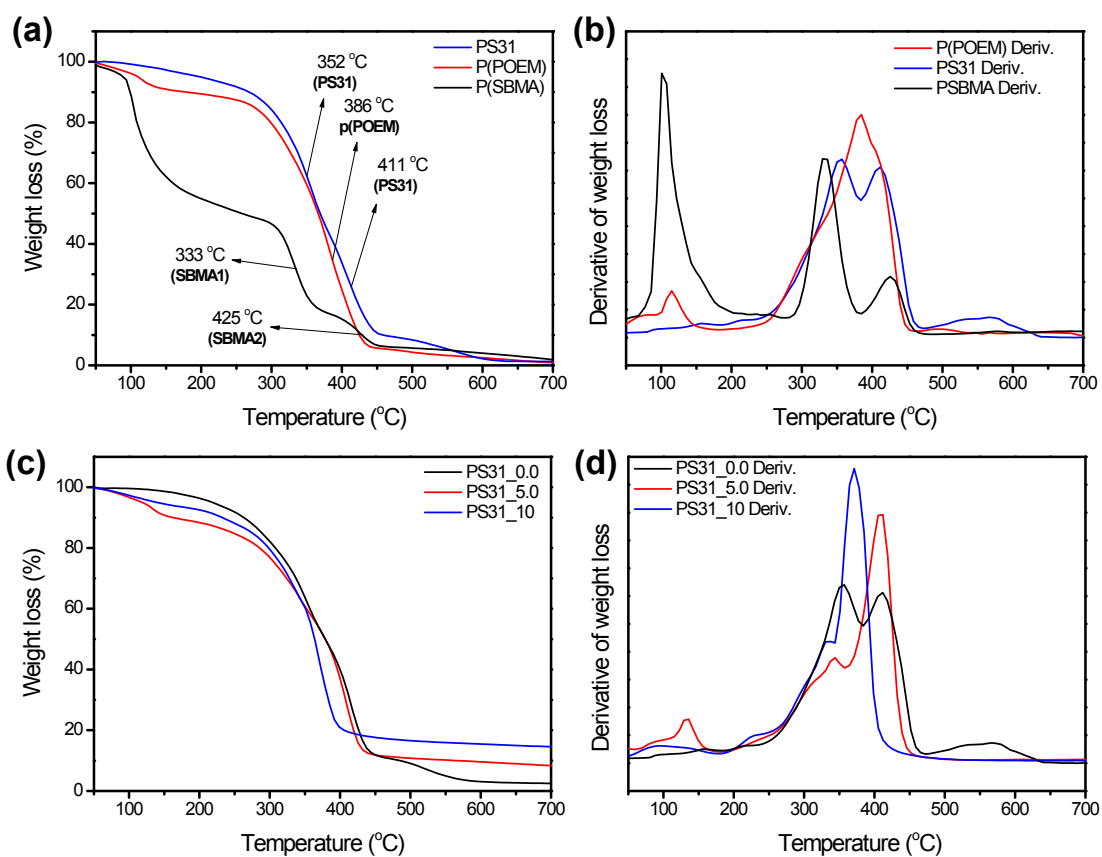

**Fig. S2.** TGA curves of coating materials according to (e) SBMA contents in synthesized copolymers and (f) derivatives of their curves, and according to (g) FeCl<sub>3</sub> contents in the coated composites and (h) derivatives of their curves.

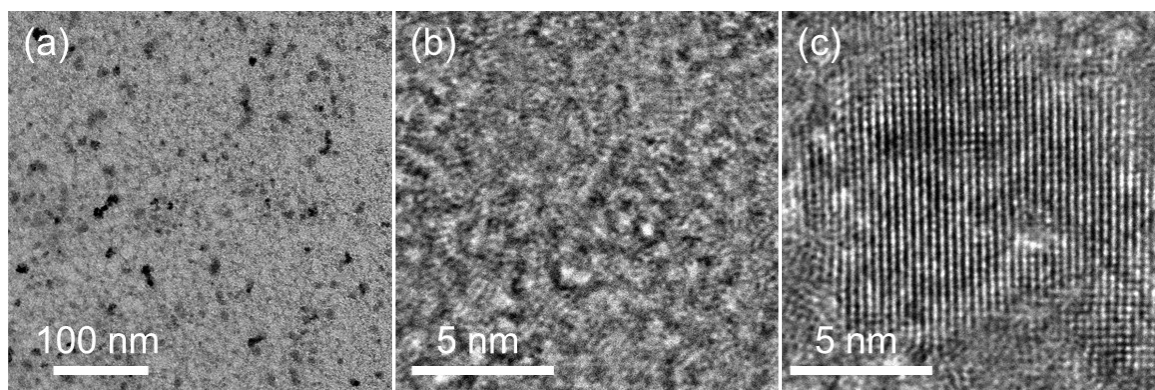

**Fig. S3.** (a) TEM image of PS31\_10 complex with 10% iron loading. (b) magnified image of bright and less dark regions of (a), and (c) magnified image of small darker dots.

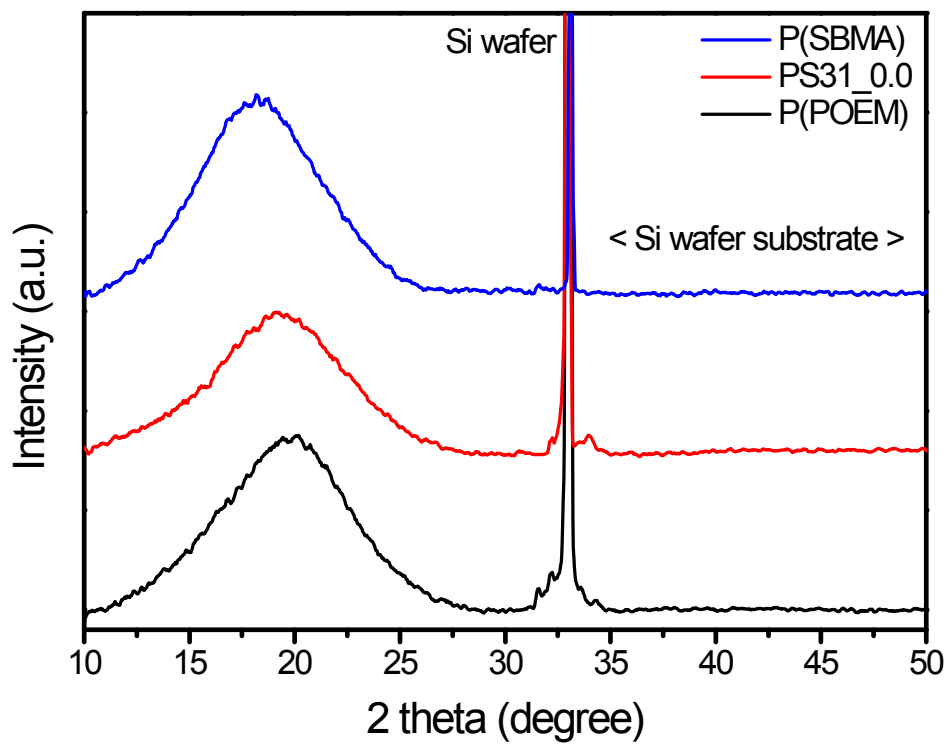

**Fig. S4.** XRD patterns of P(SBMA), P(POEM) and PS31 comb copolymers.

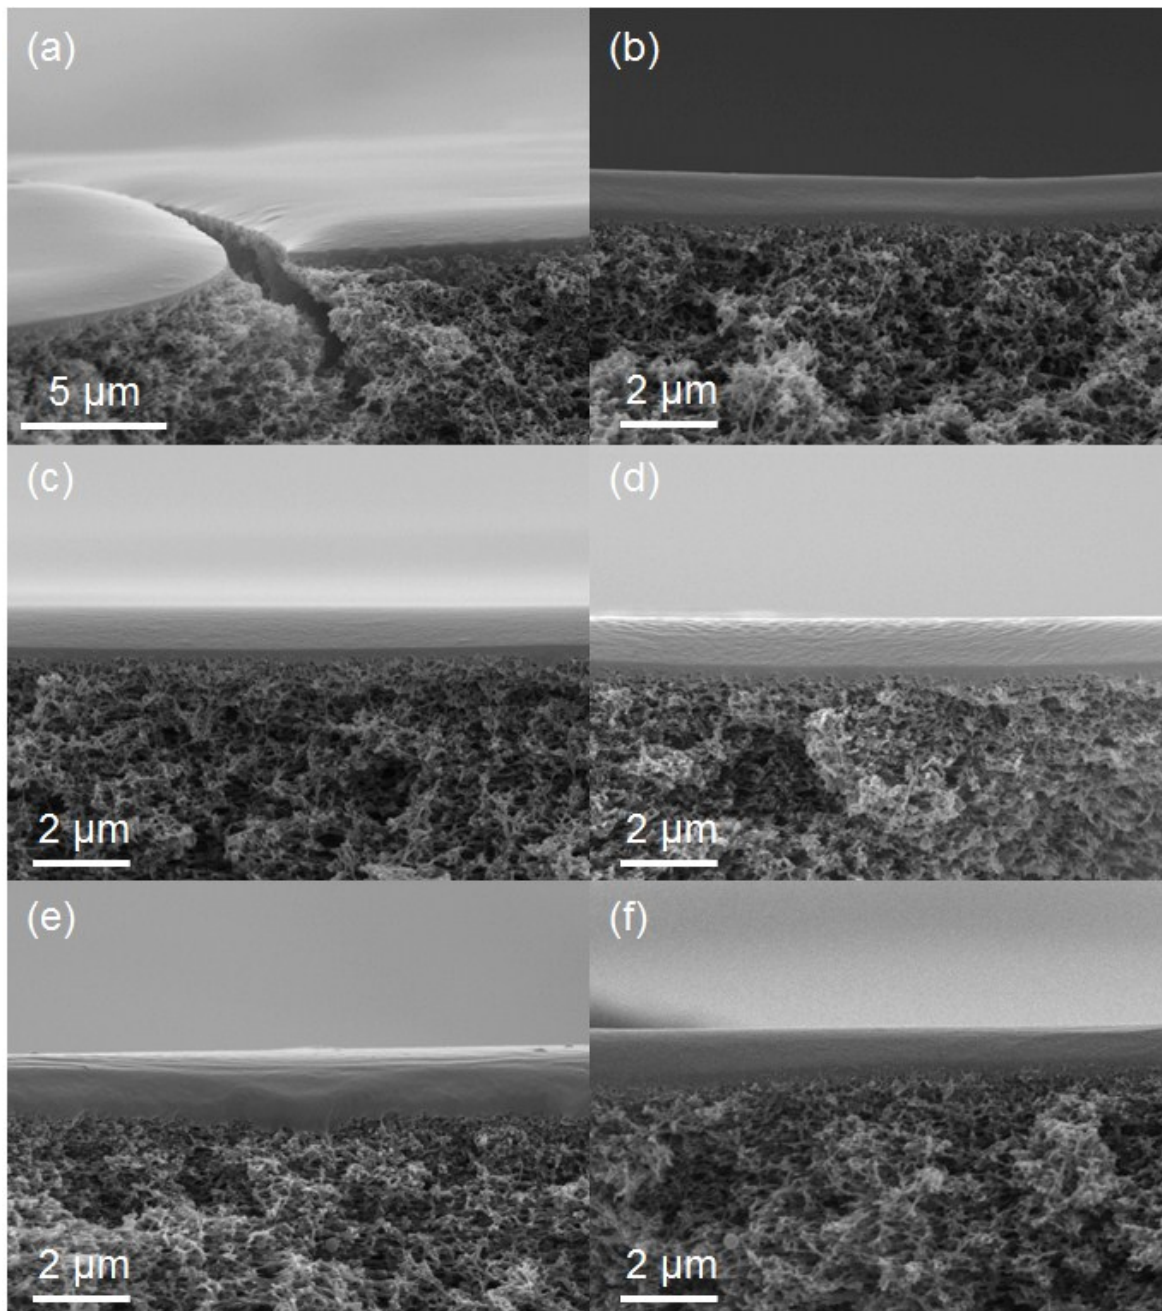

**Fig. S5.** Cross-sectional SEM images of membranes (a) PS31\_5.0, (b) PS31\_0.0, (c) PS31\_2.5, (d) PS31\_5.0, (e) PS31\_7.5 and (f) PS31\_10.
